# Supplementary material
Source: publisher figshare collection journal article supplement (https://acs.figshare.com/ndownloader/files/4517500)
Supplement: Supplementary file 1 [file 4517500]

 
data_Dy113K 
 
_audit_creation_method            SHELXL-97 
_chemical_name_systematic 
; 
 ? 
; 
_chemical_name_common             ? 
_chemical_melting_point           ? 
_chemical_formula_moiety          'C47 H35 Cu Dy F30 N8 O14' 
_chemical_formula_sum 
 'C47 H35 Cu Dy F30 N8 O14' 
_chemical_formula_weight          1731.88 
 
loop_ 
 _atom_type_symbol 
 _atom_type_description 
 _atom_type_scat_dispersion_real 
 _atom_type_scat_dispersion_imag 
 _atom_type_scat_source 
 'C'  'C'   0.0033   0.0016 
 'International Tables Vol C Tables 4.2.6.8 and 6.1.1.4' 
 'H'  'H'   0.0000   0.0000 
 'International Tables Vol C Tables 4.2.6.8 and 6.1.1.4' 
 'Cu'  'Cu'   0.3201   1.2651 
 'International Tables Vol C Tables 4.2.6.8 and 6.1.1.4' 
 'F'  'F'   0.0171   0.0103 
 'International Tables Vol C Tables 4.2.6.8 and 6.1.1.4' 
 'Dy'  'Dy'  -0.1653   3.9035 
 'International Tables Vol C Tables 4.2.6.8 and 6.1.1.4' 
 'N'  'N'   0.0061   0.0033 
 'International Tables Vol C Tables 4.2.6.8 and 6.1.1.4' 
 'O'  'O'   0.0106   0.0060 
 'International Tables Vol C Tables 4.2.6.8 and 6.1.1.4' 
 
_symmetry_cell_setting            'monoclinic' 
_symmetry_space_group_name_H-M    'P2/c' 
_symmetry_space_group_name_HALL    '-P 2yc'
 
loop_ 
 _symmetry_equiv_pos_as_xyz 
 'x, y, z' 
 '-x, y, -z+1/2' 
 '-x, -y, -z' 
 'x, -y, z-1/2' 
 
_cell_length_a                    14.588(3) 
_cell_length_b                    11.141(2) 
_cell_length_c                    20.125(4) 
_cell_angle_alpha                 90.00 
_cell_angle_beta                  108.21(3) 
_cell_angle_gamma                 90.00 
_cell_volume                      3107.0(12) 
_cell_formula_units_Z             2 
_cell_measurement_temperature     113(2) 
_cell_measurement_reflns_used     11536 
_cell_measurement_theta_min       1.6 
_cell_measurement_theta_max       27.9 
 
_exptl_crystal_description        'Prism' 
_exptl_crystal_colour             'purple' 
_exptl_crystal_size_max           0.18 
_exptl_crystal_size_mid           0.14 
_exptl_crystal_size_min           0.12 
_exptl_crystal_density_meas       ? 
_exptl_crystal_density_diffrn     1.851 
_exptl_crystal_density_method     'not measured' 
_exptl_crystal_F_000              1700 
_exptl_absorpt_coefficient_mu     1.693 
_exptl_absorpt_correction_type    'Multi-scan' 
_exptl_absorpt_correction_T_min   0.752 
_exptl_absorpt_correction_T_max   0.816 
_exptl_absorpt_process_details    CrystalClear 
 
_exptl_special_details 
; 
 ? 
; 
 
_diffrn_ambient_temperature       113(2) 
_diffrn_radiation_wavelength      0.71073 
_diffrn_radiation_type            MoK\a 
_diffrn_radiation_source          'fine-focus sealed tube' 
_diffrn_radiation_monochromator   graphite 
_diffrn_measurement_device_type   'CCD area detector'
_diffrn_measurement_method        'profile data from \w-scans'
_diffrn_detector_area_resol_mean  ? 
_diffrn_standards_number          ? 
_diffrn_standards_interval_count  ? 
_diffrn_standards_interval_time   ? 
_diffrn_standards_decay_%         ? 
_diffrn_reflns_number             24378 
_diffrn_reflns_av_R_equivalents   0.0423 
_diffrn_reflns_av_sigmaI/netI     0.0362 
_diffrn_reflns_limit_h_min        -17 
_diffrn_reflns_limit_h_max        17 
_diffrn_reflns_limit_k_min        -13 
_diffrn_reflns_limit_k_max        13 
_diffrn_reflns_limit_l_min        -23 
_diffrn_reflns_limit_l_max        23 
_diffrn_reflns_theta_min          1.47 
_diffrn_reflns_theta_max          25.01 
_reflns_number_total              5487 
_reflns_number_gt                 4757 
_reflns_threshold_expression      >2sigma(I) 
 
_computing_data_collection        'CrystalClear (Rigaku/MSC Inc., 2005)' 
_computing_cell_refinement        'CrystalClear (Rigaku/MSC Inc., 2005)' 
_computing_data_reduction         'CrystalClear (Rigaku/MSC Inc., 2005)'
_computing_structure_solution     'SHELXS-97 (Sheldrick, 1990)' 
_computing_structure_refinement   'SHELXL-97 (Sheldrick, 1997)' 
_computing_molecular_graphics     'Bruker SHELXTL' 
_computing_publication_material   'Bruker SHELXTL'
 
_refine_special_details 
; 
 Refinement of F^2^ against ALL reflections.  The weighted R-factor wR and 
 goodness of fit S are based on F^2^, conventional R-factors R are based 
 on F, with F set to zero for negative F^2^. The threshold expression of 
 F^2^ > 2sigma(F^2^) is used only for calculating R-factors(gt) etc. and is 
 not relevant to the choice of reflections for refinement.  R-factors based 
 on F^2^ are statistically about twice as large as those based on F, and R- 
 factors based on ALL data will be even larger.
DFIX 1.25 0.01 O7 C21
DFIX 1.4 0.01 C21 C20
FLAT C20 C21 O7 C22 C23 C24 O6
FLAT O2 O1 C4 C3 C2 C1 C5
DELU 0.02 0.02 F3 C5
DELU Cu1 O6
SIMU 0.01 0.02 3.8 F4 F5 F6 F7
SIMU 0.01 0.02 1.7 Cu1 O6
ISOR 0.01 0.01 C3
ISOR 0.01 0.01 C5
ISOR 0.01 0.01 F3 F2
ISOR 0.01 0.01 C4
ISOR 0.01 0.01 F1 
; 
 
_refine_ls_structure_factor_coef  Fsqd  
_refine_ls_matrix_type            full 
_refine_ls_weighting_scheme       calc  
_refine_ls_weighting_details 
 'calc w=1/[\s^2^(Fo^2^)+(0.1000P)^2^+36.0000P] where P=(Fo^2^+2Fc^2^)/3' 
_atom_sites_solution_primary      direct 
_atom_sites_solution_secondary    difmap 
_atom_sites_solution_hydrogens    geom 
_refine_ls_hydrogen_treatment     constr 
_refine_ls_extinction_method      none 
_refine_ls_extinction_coef        ? 
_refine_ls_number_reflns          5376 
_refine_ls_number_parameters      461 
_refine_ls_number_restraints      66 
_refine_ls_R_factor_all           0.0892 
_refine_ls_R_factor_gt            0.0815 
_refine_ls_wR_factor_ref          0.2106 
_refine_ls_wR_factor_gt           0.2022 
_refine_ls_goodness_of_fit_ref    1.068 
_refine_ls_restrained_S_all       1.130 
_refine_ls_shift/su_max           0.032 
_refine_ls_shift/su_mean          0.001 
 
loop_ 
 _atom_site_label 
 _atom_site_type_symbol 
 _atom_site_fract_x 
 _atom_site_fract_y 
 _atom_site_fract_z 
 _atom_site_U_iso_or_equiv 
 _atom_site_adp_type 
 _atom_site_occupancy 
 _atom_site_symmetry_multiplicity 
 _atom_site_calc_flag 
 _atom_site_refinement_flags 
 _atom_site_disorder_assembly 
 _atom_site_disorder_group 
Dy1 Dy 0.5000 0.40805(5) 0.2500 0.0290(2) Uani 1 2 d S . . 
Cu1 Cu 0.0000 0.09564(13) 0.2500 0.0354(4) Uani 1 2 d SU . . 
F4 F 0.6890(12) -0.0175(14) 0.2959(7) 0.168(5) Uani 1 1 d U . . 
F5 F 0.7555(6) 0.1000(8) 0.3741(5) 0.090(3) Uani 1 1 d U . . 
F6 F 0.6301(12) 0.0148(18) 0.3663(9) 0.188(5) Uani 1 1 d U . . 
F7 F 0.6333(9) 0.7129(8) 0.1320(7) 0.137(5) Uani 1 1 d . . . 
F8 F 0.4921(9) 0.7736(14) 0.0945(5) 0.163(7) Uani 1 1 d . . . 
F9 F 0.5917(9) 0.8685(8) 0.1690(5) 0.104(3) Uani 1 1 d . . . 
F10 F 0.2169(8) -0.2318(10) 0.2088(10) 0.163(7) Uani 1 1 d . . . 
F11 F 0.1231(13) -0.2897(10) 0.2602(6) 0.164(7) Uani 1 1 d . . . 
F12 F 0.0939(8) -0.3173(8) 0.1551(5) 0.111(4) Uani 1 1 d . . . 
F13 F -0.0967(4) -0.0507(5) -0.0107(3) 0.0435(13) Uani 1 1 d . . . 
F14 F -0.2044(4) 0.0154(7) 0.0326(4) 0.067(2) Uani 1 1 d . . . 
F15 F -0.1012(5) 0.1379(6) 0.0122(3) 0.0526(16) Uani 1 1 d . . . 
O1 O 0.5567(4) 0.3252(6) 0.1636(3) 0.0370(14) Uani 1 1 d D . . 
O2 O 0.6010(5) 0.2469(6) 0.3015(3) 0.0370(14) Uani 1 1 d D . . 
O3 O 0.5439(5) 0.5745(6) 0.1959(3) 0.0355(14) Uani 1 1 d . . . 
O4 O 0.3551(4) 0.4884(6) 0.1740(3) 0.0348(14) Uani 1 1 d . . . 
O5 O 0.0621(5) 0.3291(7) 0.0421(4) 0.0490(18) Uani 1 1 d . . . 
O6 O 0.0925(8) -0.0493(7) 0.2439(4) 0.071(3) Uani 1 1 d DU . . 
O7 O -0.0499(5) 0.0950(5) 0.1487(3) 0.0408(16) Uani 1 1 d D . . 
N1 N 0.2831(5) 0.4531(7) 0.1205(4) 0.0305(16) Uani 1 1 d . . . 
N2 N 0.1444(5) 0.3794(8) 0.0580(4) 0.0371(18) Uani 1 1 d . . . 
N3 N 0.2006(6) 0.3998(7) 0.3089(4) 0.0383(18) Uani 1 1 d . . . 
N4 N 0.1031(5) 0.2380(7) 0.2477(4) 0.0298(15) Uani 1 1 d . . . 
C1 C 0.6743(7) 0.0611(9) 0.3333(6) 0.044(2) Uani 1 1 d D . . 
C2 C 0.6297(9) 0.1620(12) 0.2781(7) 0.067(3) Uani 1 1 d D . . 
C3 C 0.6288(10) 0.1428(13) 0.2073(7) 0.070(3) Uani 1 1 d DU . . 
H3 H 0.6550 0.0728 0.1957 0.084 Uiso 1 1 calc R . . 
C4 C 0.5875(8) 0.2308(11) 0.1542(7) 0.070(4) Uani 1 1 d DU . . 
C5 C 0.5965(10) 0.1938(10) 0.0875(7) 0.060(3) Uani 1 1 d DU . . 
C6 C 0.5647(8) 0.7611(9) 0.1490(5) 0.045(2) Uani 1 1 d . . . 
C7 C 0.5348(6) 0.6854(8) 0.2026(5) 0.036(2) Uani 1 1 d . . . 
C8 C 0.5000 0.7484(13) 0.2500 0.035(3) Uani 1 2 d S . . 
H8 H 0.5000 0.8319 0.2500 0.042 Uiso 1 2 calc SR . . 
C9 C 0.2207(7) 0.4293(8) 0.2502(5) 0.035(2) Uani 1 1 d . . . 
H9 H 0.2608 0.4944 0.2508 0.042 Uiso 1 1 calc R . . 
C10 C 0.1829(6) 0.3644(8) 0.1883(4) 0.0308(18) Uani 1 1 d . . . 
C11 C 0.1238(6) 0.2691(8) 0.1894(5) 0.0320(19) Uani 1 1 d . . . 
H11 H 0.0974 0.2248 0.1488 0.038 Uiso 1 1 calc R . . 
C12 C 0.1428(7) 0.3066(8) 0.3042(5) 0.037(2) Uani 1 1 d . . . 
H12 H 0.1281 0.2863 0.3445 0.044 Uiso 1 1 calc R . . 
C13 C 0.2045(6) 0.3988(8) 0.1236(4) 0.0293(18) Uani 1 1 d . . . 
C14 C 0.2484(9) 0.6264(10) 0.0443(6) 0.052(3) Uani 1 1 d . . . 
H14A H 0.1871 0.6357 0.0520 0.078 Uiso 1 1 calc R . . 
H14B H 0.2447 0.6584 -0.0008 0.078 Uiso 1 1 calc R . . 
H14C H 0.2970 0.6688 0.0799 0.078 Uiso 1 1 calc R . . 
C15 C 0.3707(7) 0.4751(10) 0.0342(5) 0.042(2) Uani 1 1 d . . . 
H15A H 0.4183 0.5266 0.0648 0.063 Uiso 1 1 calc R . . 
H15B H 0.3644 0.4942 -0.0135 0.063 Uiso 1 1 calc R . . 
H15C H 0.3904 0.3930 0.0434 0.063 Uiso 1 1 calc R . . 
C16 C 0.2744(7) 0.4935(9) 0.0469(5) 0.037(2) Uani 1 1 d . . . 
C17 C 0.1918(7) 0.4108(9) 0.0034(5) 0.040(2) Uani 1 1 d . . . 
C18 C 0.2254(9) 0.2940(10) -0.0187(6) 0.055(3) Uani 1 1 d . . . 
H18A H 0.2703 0.2561 0.0211 0.082 Uiso 1 1 calc R . . 
H18B H 0.2563 0.3092 -0.0536 0.082 Uiso 1 1 calc R . . 
H18C H 0.1709 0.2421 -0.0378 0.082 Uiso 1 1 calc R . . 
C19 C 0.1174(8) 0.4708(13) -0.0580(6) 0.061(3) Uani 1 1 d . . . 
H19A H 0.0690 0.4133 -0.0814 0.092 Uiso 1 1 calc R . . 
H19B H 0.1485 0.5010 -0.0901 0.092 Uiso 1 1 calc R . . 
H19C H 0.0876 0.5359 -0.0412 0.092 Uiso 1 1 calc R . . 
C20 C -0.1097(7) 0.0278(9) 0.0372(4) 0.041(2) Uani 1 1 d D . . 
C21 C -0.0466(5) 0.0098(7) 0.1080(4) 0.036(2) Uani 1 1 d D . . 
C22 C 0.0087(7) -0.0948(8) 0.1255(5) 0.037(2) Uani 1 1 d D . . 
H22 H 0.0020 -0.1526 0.0910 0.044 Uiso 1 1 calc R . . 
C23 C 0.0728(9) -0.1174(9) 0.1915(5) 0.049(3) Uani 1 1 d D . . 
C24 C 0.1272(9) -0.2373(11) 0.2049(6) 0.056(3) Uani 1 1 d D . . 
F3 F 0.4986(12) 0.1646(17) 0.0460(8) 0.173(6) Uani 1 1 d U . . 
F2 F 0.6188(12) 0.1002(12) 0.0680(8) 0.157(5) Uani 1 1 d U . . 
F1 F 0.6199(10) 0.2811(9) 0.0550(5) 0.122(4) Uani 1 1 d U . . 
 
loop_ 
 _atom_site_aniso_label 
 _atom_site_aniso_U_11 
 _atom_site_aniso_U_22 
 _atom_site_aniso_U_33 
 _atom_site_aniso_U_23 
 _atom_site_aniso_U_13 
 _atom_site_aniso_U_12 
Dy1 0.0303(4) 0.0322(4) 0.0267(3) 0.000 0.0121(3) 0.000 
Cu1 0.0615(11) 0.0292(8) 0.0187(7) 0.000 0.0172(7) 0.000 
F4 0.210(11) 0.162(10) 0.121(8) -0.066(8) 0.034(8) 0.016(9) 
F5 0.066(5) 0.098(6) 0.080(5) 0.034(4) -0.015(4) -0.021(4) 
F6 0.169(10) 0.233(12) 0.169(11) 0.039(10) 0.061(9) -0.081(10) 
F7 0.206(12) 0.078(6) 0.208(12) 0.054(7) 0.183(11) 0.043(7) 
F8 0.137(9) 0.245(15) 0.067(6) 0.082(8) -0.024(6) -0.107(10) 
F9 0.186(10) 0.059(5) 0.089(6) -0.003(4) 0.074(7) -0.044(6) 
F10 0.076(7) 0.095(8) 0.286(19) 0.035(10) 0.010(9) -0.005(6) 
F11 0.328(19) 0.088(7) 0.118(9) 0.056(7) 0.132(11) 0.094(10) 
F12 0.120(8) 0.075(6) 0.098(7) -0.024(5) -0.024(6) 0.047(5) 
F13 0.048(3) 0.052(3) 0.029(3) -0.011(2) 0.010(2) 0.006(3) 
F14 0.038(3) 0.101(6) 0.063(4) -0.025(4) 0.015(3) 0.006(3) 
F15 0.076(4) 0.048(3) 0.027(3) 0.003(3) 0.007(3) 0.019(3) 
O1 0.041(4) 0.040(4) 0.035(3) -0.005(3) 0.020(3) 0.002(3) 
O2 0.041(4) 0.035(3) 0.036(3) 0.001(3) 0.014(3) 0.006(3) 
O3 0.039(4) 0.040(4) 0.032(3) 0.004(3) 0.017(3) -0.002(3) 
O4 0.029(3) 0.040(3) 0.033(3) 0.003(3) 0.007(3) -0.002(3) 
O5 0.036(4) 0.074(5) 0.037(4) 0.007(4) 0.011(3) -0.014(4) 
O6 0.135(8) 0.033(4) 0.028(4) 0.000(3) 0.001(4) -0.007(4) 
O7 0.069(5) 0.033(3) 0.025(3) 0.000(3) 0.021(3) 0.000(3) 
N1 0.030(4) 0.034(4) 0.030(4) 0.006(3) 0.013(3) 0.004(3) 
N2 0.032(4) 0.052(5) 0.028(4) 0.009(4) 0.011(3) -0.001(4) 
N3 0.047(5) 0.039(4) 0.033(4) -0.005(3) 0.018(4) -0.005(4) 
N4 0.032(4) 0.035(4) 0.023(3) 0.001(3) 0.010(3) 0.003(3) 
C1 0.040(6) 0.039(5) 0.047(6) -0.007(5) 0.006(5) -0.001(4) 
C2 0.070(8) 0.059(8) 0.065(8) -0.001(7) 0.010(7) -0.004(7) 
C3 0.083(7) 0.063(6) 0.061(7) -0.004(6) 0.019(6) 0.001(6) 
C4 0.098(8) 0.061(6) 0.071(7) 0.007(6) 0.054(6) 0.019(6) 
C5 0.092(7) 0.045(5) 0.055(6) -0.021(5) 0.041(5) -0.022(5) 
C6 0.054(6) 0.043(6) 0.039(5) 0.003(4) 0.016(5) -0.011(5) 
C7 0.031(5) 0.036(5) 0.037(5) 0.005(4) 0.007(4) -0.007(4) 
C8 0.027(6) 0.046(7) 0.030(6) 0.000 0.005(5) 0.000 
C9 0.035(5) 0.038(5) 0.037(5) -0.003(4) 0.020(4) 0.000(4) 
C10 0.037(5) 0.032(4) 0.027(4) 0.007(4) 0.016(4) 0.008(4) 
C11 0.033(5) 0.039(5) 0.027(4) 0.004(4) 0.013(4) 0.006(4) 
C12 0.046(5) 0.036(5) 0.034(5) -0.005(4) 0.022(4) -0.011(4) 
C13 0.029(4) 0.034(4) 0.027(4) 0.006(3) 0.011(4) 0.007(3) 
C14 0.067(7) 0.045(6) 0.053(7) 0.023(5) 0.032(6) 0.014(5) 
C15 0.036(5) 0.057(6) 0.040(5) 0.008(5) 0.020(4) 0.000(5) 
C16 0.040(5) 0.040(5) 0.033(5) 0.013(4) 0.017(4) 0.006(4) 
C17 0.036(5) 0.061(6) 0.030(5) 0.015(4) 0.017(4) 0.000(4) 
C18 0.072(8) 0.057(7) 0.047(6) -0.010(5) 0.036(6) -0.014(6) 
C19 0.046(6) 0.098(10) 0.037(6) 0.026(6) 0.009(5) -0.006(6) 
C20 0.045(6) 0.047(6) 0.034(5) -0.007(4) 0.015(4) 0.005(5) 
C21 0.045(5) 0.040(5) 0.029(4) -0.011(4) 0.018(4) -0.008(4) 
C22 0.046(5) 0.038(5) 0.027(4) -0.006(4) 0.012(4) -0.001(4) 
C23 0.070(7) 0.042(6) 0.030(5) 0.003(4) 0.010(5) -0.012(5) 
C24 0.056(7) 0.057(7) 0.041(6) 0.010(5) -0.006(5) -0.001(6) 
F3 0.177(9) 0.196(10) 0.141(8) -0.025(8) 0.042(7) -0.037(8) 
F2 0.209(10) 0.145(8) 0.147(8) 0.001(6) 0.099(7) 0.077(7) 
F1 0.202(8) 0.107(6) 0.089(6) -0.017(5) 0.093(6) -0.064(6) 
 
_geom_special_details 
; 
 All esds (except the esd in the dihedral angle between two l.s. planes) 
 are estimated using the full covariance matrix.  The cell esds are taken 
 into account individually in the estimation of esds in distances, angles 
 and torsion angles; correlations between esds in cell parameters are only 
 used when they are defined by crystal symmetry.  An approximate (isotropic) 
 treatment of cell esds is used for estimating esds involving l.s. planes. 
; 
 
loop_ 
 _geom_bond_atom_site_label_1 
 _geom_bond_atom_site_label_2 
 _geom_bond_distance 
 _geom_bond_site_symmetry_2 
 _geom_bond_publ_flag 
Dy1 O1 2.337(6) 2_655 ? 
Dy1 O1 2.337(6) . ? 
Dy1 O3 2.339(6) 2_655 ? 
Dy1 O3 2.339(6) . ? 
Dy1 O2 2.348(6) 2_655 ? 
Dy1 O2 2.348(6) . ? 
Dy1 O4 2.364(6) 2_655 ? 
Dy1 O4 2.364(6) . ? 
Cu1 O7 1.938(6) 2 ? 
Cu1 O7 1.938(6) . ? 
Cu1 O6 2.132(10) 2 ? 
Cu1 O6 2.132(10) . ? 
Cu1 N4 2.196(7) . ? 
Cu1 N4 2.196(7) 2 ? 
F4 C1 1.216(15) . ? 
F5 C1 1.287(12) . ? 
F6 C1 1.180(16) . ? 
F7 C6 1.273(14) . ? 
F8 C6 1.272(14) . ? 
F9 C6 1.284(13) . ? 
F10 C24 1.287(16) . ? 
F11 C24 1.274(15) . ? 
F12 C24 1.316(14) . ? 
F13 C20 1.357(10) . ? 
F14 C20 1.362(11) . ? 
F15 C20 1.346(12) . ? 
O1 C4 1.182(14) . ? 
O2 C2 1.189(15) . ? 
O3 C7 1.254(11) . ? 
O4 N1 1.308(10) . ? 
O5 N2 1.273(10) . ? 
O6 C23 1.257(13) . ? 
O7 C21 1.265(8) . ? 
N1 C13 1.315(11) . ? 
N1 C16 1.514(11) . ? 
N2 C13 1.354(12) . ? 
N2 C17 1.511(11) . ? 
N3 C12 1.322(12) . ? 
N3 C9 1.344(12) . ? 
N4 C12 1.342(12) . ? 
N4 C11 1.344(11) . ? 
C1 C2 1.572(17) . ? 
C2 C3 1.437(19) . ? 
C3 C4 1.437(19) . ? 
C3 H3 0.9300 . ? 
C4 C5 1.449(17) . ? 
C5 F2 1.194(15) . ? 
C5 F1 1.276(14) . ? 
C5 F3 1.449(19) . ? 
C6 C7 1.536(13) . ? 
C7 C8 1.401(12) . ? 
C8 C7 1.401(12) 2_655 ? 
C8 H8 0.9300 . ? 
C9 C10 1.395(13) . ? 
C9 H9 0.9300 . ? 
C10 C11 1.373(13) . ? 
C10 C13 1.483(11) . ? 
C11 H11 0.9300 . ? 
C12 H12 0.9300 . ? 
C14 C16 1.525(14) . ? 
C14 H14A 0.9600 . ? 
C14 H14B 0.9600 . ? 
C14 H14C 0.9600 . ? 
C15 C16 1.518(13) . ? 
C15 H15A 0.9600 . ? 
C15 H15B 0.9600 . ? 
C15 H15C 0.9600 . ? 
C16 C17 1.552(14) . ? 
C17 C18 1.507(15) . ? 
C17 C19 1.521(14) . ? 
C18 H18A 0.9600 . ? 
C18 H18B 0.9600 . ? 
C18 H18C 0.9600 . ? 
C19 H19A 0.9600 . ? 
C19 H19B 0.9600 . ? 
C19 H19C 0.9600 . ? 
C20 C21 1.449(9) . ? 
C21 C22 1.399(13) . ? 
C22 C23 1.388(14) . ? 
C22 H22 0.9300 . ? 
C23 C24 1.534(16) . ? 
 
loop_ 
 _geom_angle_atom_site_label_1 
 _geom_angle_atom_site_label_2 
 _geom_angle_atom_site_label_3 
 _geom_angle 
 _geom_angle_site_symmetry_1 
 _geom_angle_site_symmetry_3 
 _geom_angle_publ_flag 
O1 Dy1 O1 133.5(3) 2_655 . ? 
O1 Dy1 O3 75.8(2) 2_655 2_655 ? 
O1 Dy1 O3 150.7(2) . 2_655 ? 
O1 Dy1 O3 150.7(2) 2_655 . ? 
O1 Dy1 O3 75.8(2) . . ? 
O3 Dy1 O3 75.1(3) 2_655 . ? 
O1 Dy1 O2 73.0(2) 2_655 2_655 ? 
O1 Dy1 O2 71.9(2) . 2_655 ? 
O3 Dy1 O2 125.9(2) 2_655 2_655 ? 
O3 Dy1 O2 128.8(2) . 2_655 ? 
O1 Dy1 O2 71.9(2) 2_655 . ? 
O1 Dy1 O2 73.0(2) . . ? 
O3 Dy1 O2 128.8(2) 2_655 . ? 
O3 Dy1 O2 125.9(2) . . ? 
O2 Dy1 O2 80.2(3) 2_655 . ? 
O1 Dy1 O4 97.0(2) 2_655 2_655 ? 
O1 Dy1 O4 100.3(2) . 2_655 ? 
O3 Dy1 O4 73.6(2) 2_655 2_655 ? 
O3 Dy1 O4 71.4(2) . 2_655 ? 
O2 Dy1 O4 152.4(2) 2_655 2_655 ? 
O2 Dy1 O4 72.1(2) . 2_655 ? 
O1 Dy1 O4 100.3(2) 2_655 . ? 
O1 Dy1 O4 97.0(2) . . ? 
O3 Dy1 O4 71.4(2) 2_655 . ? 
O3 Dy1 O4 73.6(2) . . ? 
O2 Dy1 O4 72.1(2) 2_655 . ? 
O2 Dy1 O4 152.4(2) . . ? 
O4 Dy1 O4 135.5(3) 2_655 . ? 
O7 Cu1 O7 179.6(3) 2 . ? 
O7 Cu1 O6 88.4(3) 2 2 ? 
O7 Cu1 O6 91.3(3) . 2 ? 
O7 Cu1 O6 91.3(3) 2 . ? 
O7 Cu1 O6 88.4(3) . . ? 
O6 Cu1 O6 81.5(5) 2 . ? 
O7 Cu1 N4 89.4(3) 2 . ? 
O7 Cu1 N4 90.8(3) . . ? 
O6 Cu1 N4 176.3(3) 2 . ? 
O6 Cu1 N4 95.5(3) . . ? 
O7 Cu1 N4 90.8(3) 2 2 ? 
O7 Cu1 N4 89.4(3) . 2 ? 
O6 Cu1 N4 95.5(3) 2 2 ? 
O6 Cu1 N4 176.3(3) . 2 ? 
N4 Cu1 N4 87.5(4) . 2 ? 
C4 O1 Dy1 135.4(8) . . ? 
C2 O2 Dy1 133.1(8) . . ? 
C7 O3 Dy1 132.6(6) . . ? 
N1 O4 Dy1 138.1(5) . . ? 
C23 O6 Cu1 121.5(8) . . ? 
C21 O7 Cu1 127.3(6) . . ? 
O4 N1 C13 125.9(7) . . ? 
O4 N1 C16 121.1(7) . . ? 
C13 N1 C16 112.0(7) . . ? 
O5 N2 C13 126.0(7) . . ? 
O5 N2 C17 121.9(7) . . ? 
C13 N2 C17 111.6(7) . . ? 
C12 N3 C9 116.0(8) . . ? 
C12 N4 C11 115.9(8) . . ? 
C12 N4 Cu1 120.7(6) . . ? 
C11 N4 Cu1 123.1(6) . . ? 
F6 C1 F4 105.5(15) . . ? 
F6 C1 F5 110.1(13) . . ? 
F4 C1 F5 109.4(12) . . ? 
F6 C1 C2 122.2(13) . . ? 
F4 C1 C2 101.1(12) . . ? 
F5 C1 C2 107.7(9) . . ? 
O2 C2 C3 128.0(13) . . ? 
O2 C2 C1 114.1(12) . . ? 
C3 C2 C1 117.9(12) . . ? 
C2 C3 C4 120.5(13) . . ? 
C2 C3 H3 119.7 . . ? 
C4 C3 H3 119.7 . . ? 
O1 C4 C3 125.4(12) . . ? 
O1 C4 C5 123.4(12) . . ? 
C3 C4 C5 110.9(12) . . ? 
F2 C5 F1 110.7(12) . . ? 
F2 C5 C4 131.6(14) . . ? 
F1 C5 C4 112.0(10) . . ? 
F2 C5 F3 86.3(13) . . ? 
F1 C5 F3 104.5(13) . . ? 
C4 C5 F3 103.8(10) . . ? 
F8 C6 F7 109.0(13) . . ? 
F8 C6 F9 105.0(12) . . ? 
F7 C6 F9 106.6(11) . . ? 
F8 C6 C7 108.9(9) . . ? 
F7 C6 C7 112.1(9) . . ? 
F9 C6 C7 114.8(9) . . ? 
O3 C7 C8 129.8(9) . . ? 
O3 C7 C6 113.7(9) . . ? 
C8 C7 C6 116.5(9) . . ? 
C7 C8 C7 119.8(12) 2_655 . ? 
C7 C8 H8 120.1 2_655 . ? 
C7 C8 H8 120.1 . . ? 
N3 C9 C10 121.6(8) . . ? 
N3 C9 H9 119.2 . . ? 
C10 C9 H9 119.2 . . ? 
C11 C10 C9 117.5(8) . . ? 
C11 C10 C13 121.4(8) . . ? 
C9 C10 C13 121.1(8) . . ? 
N4 C11 C10 121.8(8) . . ? 
N4 C11 H11 119.1 . . ? 
C10 C11 H11 119.1 . . ? 
N3 C12 N4 127.2(8) . . ? 
N3 C12 H12 116.4 . . ? 
N4 C12 H12 116.4 . . ? 
N1 C13 N2 109.6(7) . . ? 
N1 C13 C10 126.0(8) . . ? 
N2 C13 C10 124.4(8) . . ? 
C16 C14 H14A 109.5 . . ? 
C16 C14 H14B 109.5 . . ? 
H14A C14 H14B 109.5 . . ? 
C16 C14 H14C 109.5 . . ? 
H14A C14 H14C 109.5 . . ? 
H14B C14 H14C 109.5 . . ? 
C16 C15 H15A 109.5 . . ? 
C16 C15 H15B 109.5 . . ? 
H15A C15 H15B 109.5 . . ? 
C16 C15 H15C 109.5 . . ? 
H15A C15 H15C 109.5 . . ? 
H15B C15 H15C 109.5 . . ? 
N1 C16 C15 109.0(7) . . ? 
N1 C16 C14 105.5(8) . . ? 
C15 C16 C14 111.0(8) . . ? 
N1 C16 C17 100.9(7) . . ? 
C15 C16 C17 114.9(8) . . ? 
C14 C16 C17 114.6(9) . . ? 
C18 C17 N2 106.3(8) . . ? 
C18 C17 C19 110.8(10) . . ? 
N2 C17 C19 108.6(8) . . ? 
C18 C17 C16 114.4(8) . . ? 
N2 C17 C16 100.2(7) . . ? 
C19 C17 C16 115.4(9) . . ? 
C17 C18 H18A 109.5 . . ? 
C17 C18 H18B 109.5 . . ? 
H18A C18 H18B 109.5 . . ? 
C17 C18 H18C 109.5 . . ? 
H18A C18 H18C 109.5 . . ? 
H18B C18 H18C 109.5 . . ? 
C17 C19 H19A 109.5 . . ? 
C17 C19 H19B 109.5 . . ? 
H19A C19 H19B 109.5 . . ? 
C17 C19 H19C 109.5 . . ? 
H19A C19 H19C 109.5 . . ? 
H19B C19 H19C 109.5 . . ? 
F15 C20 F13 105.8(7) . . ? 
F15 C20 F14 106.0(8) . . ? 
F13 C20 F14 104.5(7) . . ? 
F15 C20 C21 112.9(7) . . ? 
F13 C20 C21 115.0(7) . . ? 
F14 C20 C21 111.8(7) . . ? 
O7 C21 C22 126.7(8) . . ? 
O7 C21 C20 113.1(8) . . ? 
C22 C21 C20 120.1(7) . . ? 
C23 C22 C21 123.7(9) . . ? 
C23 C22 H22 118.1 . . ? 
C21 C22 H22 118.1 . . ? 
O6 C23 C22 127.0(11) . . ? 
O6 C23 C24 114.1(10) . . ? 
C22 C23 C24 118.9(9) . . ? 
F11 C24 F10 107.1(13) . . ? 
F11 C24 F12 104.3(12) . . ? 
F10 C24 F12 101.9(13) . . ? 
F11 C24 C23 112.9(12) . . ? 
F10 C24 C23 115.5(11) . . ? 
F12 C24 C23 114.1(9) . . ? 
 
loop_ 
 _geom_torsion_atom_site_label_1 
 _geom_torsion_atom_site_label_2 
 _geom_torsion_atom_site_label_3 
 _geom_torsion_atom_site_label_4 
 _geom_torsion 
 _geom_torsion_site_symmetry_1 
 _geom_torsion_site_symmetry_2 
 _geom_torsion_site_symmetry_3 
 _geom_torsion_site_symmetry_4 
 _geom_torsion_publ_flag 
O1 Dy1 O1 C4 -19.4(8) 2_655 . . . ? 
O3 Dy1 O1 C4 165.3(8) 2_655 . . . ? 
O3 Dy1 O1 C4 158.2(9) . . . . ? 
O2 Dy1 O1 C4 -62.1(8) 2_655 . . . ? 
O2 Dy1 O1 C4 22.9(9) . . . . ? 
O4 Dy1 O1 C4 90.5(9) 2_655 . . . ? 
O4 Dy1 O1 C4 -130.7(8) . . . . ? 
O1 Dy1 O2 C2 129.7(11) 2_655 . . . ? 
O1 Dy1 O2 C2 -19.3(10) . . . . ? 
O3 Dy1 O2 C2 -176.7(10) 2_655 . . . ? 
O3 Dy1 O2 C2 -76.7(11) . . . . ? 
O2 Dy1 O2 C2 54.6(10) 2_655 . . . ? 
O4 Dy1 O2 C2 -126.4(10) 2_655 . . . ? 
O4 Dy1 O2 C2 52.5(12) . . . . ? 
O1 Dy1 O3 C7 -9.5(11) 2_655 . . . ? 
O1 Dy1 O3 C7 174.0(9) . . . . ? 
O3 Dy1 O3 C7 -2.4(7) 2_655 . . . ? 
O2 Dy1 O3 C7 121.9(8) 2_655 . . . ? 
O2 Dy1 O3 C7 -129.8(8) . . . . ? 
O4 Dy1 O3 C7 -79.8(8) 2_655 . . . ? 
O4 Dy1 O3 C7 72.2(8) . . . . ? 
O1 Dy1 O4 N1 -88.4(7) 2_655 . . . ? 
O1 Dy1 O4 N1 48.2(7) . . . . ? 
O3 Dy1 O4 N1 -159.5(8) 2_655 . . . ? 
O3 Dy1 O4 N1 121.1(8) . . . . ? 
O2 Dy1 O4 N1 -20.2(7) 2_655 . . . ? 
O2 Dy1 O4 N1 -18.0(10) . . . . ? 
O4 Dy1 O4 N1 160.5(8) 2_655 . . . ? 
O7 Cu1 O6 C23 156.3(9) 2 . . . ? 
O7 Cu1 O6 C23 -23.4(9) . . . . ? 
O6 Cu1 O6 C23 68.1(9) 2 . . . ? 
N4 Cu1 O6 C23 -114.1(9) . . . . ? 
N4 Cu1 O6 C23 31(5) 2 . . . ? 
O7 Cu1 O7 C21 -19.8(7) 2 . . . ? 
O6 Cu1 O7 C21 -60.5(7) 2 . . . ? 
O6 Cu1 O7 C21 21.0(7) . . . . ? 
N4 Cu1 O7 C21 116.5(7) . . . . ? 
N4 Cu1 O7 C21 -156.0(7) 2 . . . ? 
Dy1 O4 N1 C13 87.3(10) . . . . ? 
Dy1 O4 N1 C16 -104.7(9) . . . . ? 
O7 Cu1 N4 C12 -20.6(7) 2 . . . ? 
O7 Cu1 N4 C12 159.7(7) . . . . ? 
O6 Cu1 N4 C12 -75(5) 2 . . . ? 
O6 Cu1 N4 C12 -111.8(7) . . . . ? 
N4 Cu1 N4 C12 70.3(7) 2 . . . ? 
O7 Cu1 N4 C11 165.4(7) 2 . . . ? 
O7 Cu1 N4 C11 -14.3(7) . . . . ? 
O6 Cu1 N4 C11 111(4) 2 . . . ? 
O6 Cu1 N4 C11 74.2(7) . . . . ? 
N4 Cu1 N4 C11 -103.7(7) 2 . . . ? 
Dy1 O2 C2 C3 15(2) . . . . ? 
Dy1 O2 C2 C1 -165.1(6) . . . . ? 
F6 C1 C2 O2 57.4(18) . . . . ? 
F4 C1 C2 O2 173.9(13) . . . . ? 
F5 C1 C2 O2 -71.4(14) . . . . ? 
F6 C1 C2 C3 -123.0(16) . . . . ? 
F4 C1 C2 C3 -6.6(16) . . . . ? 
F5 C1 C2 C3 108.2(13) . . . . ? 
O2 C2 C3 C4 -2(2) . . . . ? 
C1 C2 C3 C4 179.0(10) . . . . ? 
Dy1 O1 C4 C3 -21.3(14) . . . . ? 
Dy1 O1 C4 C5 164.7(7) . . . . ? 
C2 C3 C4 O1 4.0(17) . . . . ? 
C2 C3 C4 C5 178.7(11) . . . . ? 
O1 C4 C5 F2 -173.5(17) . . . . ? 
C3 C4 C5 F2 12(2) . . . . ? 
O1 C4 C5 F1 36.1(16) . . . . ? 
C3 C4 C5 F1 -138.7(13) . . . . ? 
O1 C4 C5 F3 -76.1(13) . . . . ? 
C3 C4 C5 F3 109.2(13) . . . . ? 
Dy1 O3 C7 C8 5.1(14) . . . . ? 
Dy1 O3 C7 C6 -173.2(6) . . . . ? 
F8 C6 C7 O3 88.1(13) . . . . ? 
F7 C6 C7 O3 -32.6(14) . . . . ? 
F9 C6 C7 O3 -154.5(11) . . . . ? 
F8 C6 C7 C8 -90.5(13) . . . . ? 
F7 C6 C7 C8 148.8(10) . . . . ? 
F9 C6 C7 C8 26.9(13) . . . . ? 
O3 C7 C8 C7 -2.7(8) . . . 2_655 ? 
C6 C7 C8 C7 175.6(9) . . . 2_655 ? 
C12 N3 C9 C10 -0.3(13) . . . . ? 
N3 C9 C10 C11 0.2(13) . . . . ? 
N3 C9 C10 C13 179.1(8) . . . . ? 
C12 N4 C11 C10 0.7(12) . . . . ? 
Cu1 N4 C11 C10 175.0(6) . . . . ? 
C9 C10 C11 N4 -0.4(13) . . . . ? 
C13 C10 C11 N4 -179.3(8) . . . . ? 
C9 N3 C12 N4 0.6(15) . . . . ? 
C11 N4 C12 N3 -0.9(14) . . . . ? 
Cu1 N4 C12 N3 -175.3(8) . . . . ? 
O4 N1 C13 N2 177.9(8) . . . . ? 
C16 N1 C13 N2 9.1(10) . . . . ? 
O4 N1 C13 C10 -1.5(14) . . . . ? 
C16 N1 C13 C10 -170.3(8) . . . . ? 
O5 N2 C13 N1 -179.8(9) . . . . ? 
C17 N2 C13 N1 7.5(10) . . . . ? 
O5 N2 C13 C10 -0.4(15) . . . . ? 
C17 N2 C13 C10 -173.1(8) . . . . ? 
C11 C10 C13 N1 -152.4(9) . . . . ? 
C9 C10 C13 N1 28.7(13) . . . . ? 
C11 C10 C13 N2 28.3(13) . . . . ? 
C9 C10 C13 N2 -150.6(9) . . . . ? 
O4 N1 C16 C15 48.6(11) . . . . ? 
C13 N1 C16 C15 -142.0(8) . . . . ? 
O4 N1 C16 C14 -70.6(10) . . . . ? 
C13 N1 C16 C14 98.8(9) . . . . ? 
O4 N1 C16 C17 169.9(7) . . . . ? 
C13 N1 C16 C17 -20.7(9) . . . . ? 
O5 N2 C17 C18 -73.2(11) . . . . ? 
C13 N2 C17 C18 99.8(10) . . . . ? 
O5 N2 C17 C19 46.0(13) . . . . ? 
C13 N2 C17 C19 -140.9(9) . . . . ? 
O5 N2 C17 C16 167.4(8) . . . . ? 
C13 N2 C17 C16 -19.5(10) . . . . ? 
N1 C16 C17 C18 -91.2(9) . . . . ? 
C15 C16 C17 C18 25.8(11) . . . . ? 
C14 C16 C17 C18 156.1(8) . . . . ? 
N1 C16 C17 N2 22.0(8) . . . . ? 
C15 C16 C17 N2 139.0(8) . . . . ? 
C14 C16 C17 N2 -90.7(9) . . . . ? 
N1 C16 C17 C19 138.5(8) . . . . ? 
C15 C16 C17 C19 -104.5(10) . . . . ? 
C14 C16 C17 C19 25.8(12) . . . . ? 
Cu1 O7 C21 C22 -12.6(11) . . . . ? 
Cu1 O7 C21 C20 166.2(6) . . . . ? 
F15 C20 C21 O7 47.8(8) . . . . ? 
F13 C20 C21 O7 169.4(8) . . . . ? 
F14 C20 C21 O7 -71.6(9) . . . . ? 
F15 C20 C21 C22 -133.2(8) . . . . ? 
F13 C20 C21 C22 -11.6(10) . . . . ? 
F14 C20 C21 C22 107.3(9) . . . . ? 
O7 C21 C22 C23 -3.1(14) . . . . ? 
C20 C21 C22 C23 178.1(9) . . . . ? 
Cu1 O6 C23 C22 18.3(17) . . . . ? 
Cu1 O6 C23 C24 -161.5(8) . . . . ? 
C21 C22 C23 O6 -1.5(18) . . . . ? 
C21 C22 C23 C24 178.2(9) . . . . ? 
O6 C23 C24 F11 48.9(17) . . . . ? 
C22 C23 C24 F11 -130.9(14) . . . . ? 
O6 C23 C24 F10 -74.7(17) . . . . ? 
C22 C23 C24 F10 105.4(15) . . . . ? 
O6 C23 C24 F12 167.7(12) . . . . ? 
C22 C23 C24 F12 -12.1(17) . . . . ? 
 
_diffrn_measured_fraction_theta_max    0.980 
_diffrn_reflns_theta_full              25.01 
_diffrn_measured_fraction_theta_full   0.980 
_refine_diff_density_max    3.402 
_refine_diff_density_min   -1.860 
_refine_diff_density_rms    0.196 
